# Supplementary material for: Electronegative low density lipoprotein induces renal apoptosis and fibrosis: STRA6 signaling involved
Source: PubMed Central journal article supplement (PMC4959859; doi:10.1194/jlr.m067215), 2016-08
Supplement: 10.1194_M067215_jlr.M067215-1.pdf [file 10.1194_M067215_jlr.M067215-1.pdf]

SUPPLEMENT

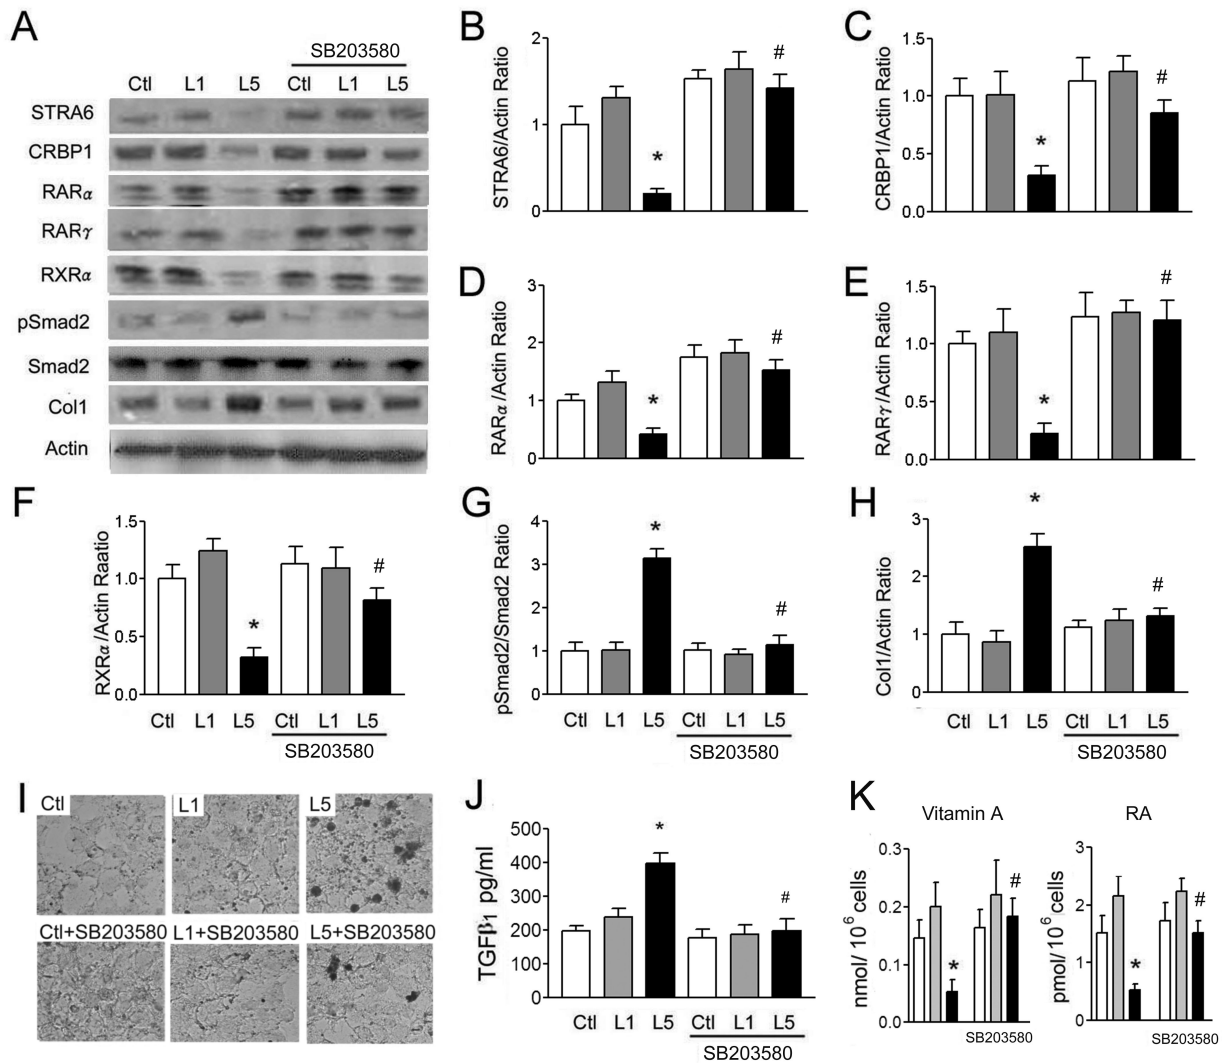

**Figure S1.** p38MAPK inhibitor represses L5 effect on STRA6 cascades and renal injury. (A) Western blots showed STRA6, CRBP1, RAR $\alpha$ , RAR $\gamma$ , RXR $\alpha$ , pSmad2, and collagen 1 (Col1) of Ctl, L1-, or L5-treated RETC cells with or without SB203580 treatment for 24 hours (n=3). Quantitative analysis showed that L5 treatment decreased STRA6 (B), CRBP1(C), RAR $\alpha$  (D), RAR $\gamma$  (E), and RXR $\alpha$  (F), but increased pSmad2/Smad2 ratio (G) and Collagen 1 (H). All these effects of L5 were reversed in SB203580-treated RETC cells under L5-stimulation. (I) Representative optical microscopy images showed nuclei of apoptotic cells (thick dark stain) in Ctl, L1-treated, L5-treated cells with or without SB203580 treatment. SB203580 decreased nuclei of apoptotic cells in RETC cells under L5-stimulation. (J) ELISA showed SB203580 treatment attenuated the increase of TGF $\beta$ <sub>1</sub> concentration in culture medium of L5-treated RETC cells. (K) ELISA revealed that SB204580 treatment reversed the reduction of vitamin A and RA level under L5 stimulation in of RETC cells. \* P<0.05 vs. Ctl and L1; #P<0.05 vs. L5.
